*Daphnia*'s dilemma of adjusting carbon budgets when facing limitations by food quantity and the essential organic compound cholesterol

Marcus Lukas<sup>1</sup> and Alexander Wacker

Department of Ecology and Ecosystem Modelling  
Institute of Biochemistry and Biology, University of Potsdam  
Am Neuen Palais 10, D 14469 Potsdam, Germany

<sup>1</sup> Corresponding author:

E-mail: [marcus.lukas@gmail.com](mailto:marcus.lukas@gmail.com)

Telephone number: 00 49 33 19 77 48 16

Fax number: 00 49 33 19 77 19 48

Running head: Carbon budgets of *Daphnia*

## 1 **Summary**

2 We studied the carbon metabolism in *Daphnia* when the amount of carbon (food quantity)  
3 and/or the content of biochemical nutrients (food quality) are limiting. Growth performances  
4 and carbon (C) budgets of *Daphnia magna* (assimilation, faeces egestion, excretion and  
5 respiration measured by [<sup>14</sup>C]-tracing) were analysed when animals were raised on different  
6 food quantities and concentrations of cholesterol, an essential biochemical food compound.  
7 Cholesterol is of special interest because it not only acts as limiting nutrient but also  
8 contributes to the overall carbon pool of the animals. As the tissue cholesterol concentration  
9 in *Daphnia* is quite low, we hypothesized the selective exclusion of cholesterol from carbon  
10 budgeting and tested this by using radiolabelled cholesterol. Somatic growth rates of *D.*  
11 *magna* were highest at high quantity and quality and were reduced to a moderate value if  
12 either the food quantity or the cholesterol concentration was low. Growth was lowest at low  
13 food quantity and quality. The measurements of C budgets revealed high regulative response  
14 to low food quality at high food quantity only. Here, low dietary cholesterol caused that bulk  
15 carbon assimilation efficiency (AE) decreased and that assimilated (excess) carbon was  
16 increasingly respired. Additionally, *Daphnia* enhanced efficient adjustment of C budgets  
17 when facing cholesterol limitation by (i) increasing the AE of the cholesterol itself and (ii) not  
18 changing cholesterol respiration which was still not detectable. In contrast, at low food  
19 quantity *Daphnia* has the dilemma to be unable to adjust for low food quality emphasizing  
20 that food quantity limitation could overrule food quality effects.

## 21 **Introduction**

22 Information on the flow of energy and nutrients is necessary for the understanding of the  
23 individual performance of consumers, of trophic interactions and of the regulation in food  
24 webs (Andersen, 1997; Gaedke et al., 2002). Especially in aquatic ecosystems there are two  
25 major issues controlling the interaction between primary producers and primary consumers:  
26 First, the amount of energy (e.g., in terms of carbon) supplied by the phytoplankton  
27 community (food quantity) and, second, the content of nutrients (e.g., minerals or essential  
28 biochemicals) in the algae (food quality). Cladocerans as predominant filter feeding  
29 zooplankton, are limited by energy availability because of low carbon concentrations, e.g. in  
30 the clear-water phase in spring (Sommer et al., 1986; Jeppesen et al., 1999) or due to reduced  
31 ingestibility (e.g., Gliwicz and Lampert, 1990) and/ or digestibility (Van Donk et al., 1997;  
32 DeMott et al., 2010). Besides energy availability, zooplankton might be affected by low  
33 nutritional quality of the food, because animals obtain a large set of essential or nearly  
34 essential requirements from their food (Sterner and Schulz, 1998). Many recent studies have  
35 investigated herbivore's performance at unbalanced element to carbon ratios (Sterner and  
36 Elser, 2002) or imbalanced ratios of macronutrients (Raubenheimer and Simpson, 2004).  
37 Recently studies have focused on herbivores' growth limitation by polyunsaturated fatty  
38 acids, amino acids, vitamins and sterols (Anderson et al., 2004; Wacker and Martin-  
39 Creuzburg, 2012). Sterols are essential food components for herbivorous arthropods (Behmer  
40 and Nes, 2003; von Elert et al., 2003), which cannot synthesize cholesterol (the predominant  
41 animal sterol) *de novo* but metabolize it from phytosterols in their diet (Svoboda and  
42 Thompson, 1985). Cholesterol serves as precursor for moult-inducing ecdysteroids in  
43 arthropods (Goad, 1981). Moreover, cholesterol is an indispensable component of plasma  
44 membranes, and because of its stabilizing properties (Robertson and Hazel, 1997) necessary  
45 for membrane temperature adaptation (Crockett, 1998; Sperfeld and Wacker, 2009, 2011).

46 Feeding on cyanobacteria can cause growth limitation of herbivorous crustaceans (von Elert  
47 et al., 2003) since cyanobacteria usually lack sterols (Volkman, 2003), an effect possibly  
48 exacerbated during cyanobacteria blooms (Wacker and Martin-Creuzburg, 2007). However,  
49 herbivore sterol limitation might not be restricted to cyanobacteria blooms as also eukaryotic  
50 algae can be poor in sterols. In particular, high light intensity and low nutrient availability (for  
51 instance in summer) can reduce sterol concentrations in algae below critical levels for  
52 herbivorous zooplankton, such as *Daphnia* (Piepho et al., 2010; 2012). Furthermore, not all  
53 phytosterols of eukaryotic algae are suitable precursors for cholesterol, and they vary in their  
54 conversion efficiency to cholesterol (Martin-Creuzburg and von Elert, 2004). Thus, the  
55 growth of herbivorous crustaceans may depend not only on the amount of sterols in their diet  
56 but also on the phytosterol composition (Piepho et al., 2010), which is determined by the  
57 phytoplankton community composition.

58 Recent studies focused mostly on the effects of different food conditions on herbivores'  
59 growth but neglected measurements of carbon partitioning into different physiological  
60 fractions. However, such knowledge is very important to predict the contribution of  
61 herbivores to the overall carbon (C) cycling in freshwater systems (He and Wang, 2006).  
62 *Daphnia* is a model organism of freshwater ecology for several reasons; e.g., *Daphnia* plays  
63 an important ecological role as keystone species in aquatic ecosystems, there is a wealth of  
64 information about *Daphnia*'s biology and its complete genomic information is available  
65 (Lampert, 2011). *Daphnia* has several behavioural and metabolic adaptations for dealing with  
66 food limitations. Low food quantity causes that *Daphnia* filters at maximal rate to increase the  
67 C assimilation and that the retention time of food in the gut increases (Geller, 1975; DeMott  
68 et al., 2010). Moreover, losses of C are diminished by reducing respiration (Lampert, 1986;  
69 Urabe and Watanabe, 1990; Schmoker and Hernandez-Leon, 2003). This response of the  
70 respiration rate to changing food concentrations refers to the increase in energy expenditure

71 that occurs during digestion and is defined as specific dynamic action (SDA) (e.g., Kiørboe et  
72 al., 1985; Lampert, 1986; Secor, 2009).

73 In contrast, when food quality is low, daphnids have either to improve the assimilation of  
74 the potentially limiting compound in their diet and/or to get rid of the excess of other dietary  
75 ingredients, mostly C (see review by Hessen and Anderson, 2008 and model approach by  
76 Anderson et al., 2005). However, organisms may increase their fitness using this excess of C  
77 for other purposes, like storage, structure, and defence (Hessen and Anderson, 2008). Recent  
78 studies with phosphorus (P) limited *Daphnia* showed adjustments in ingestion rate  
79 (Darchambeau and Thys, 2005) and assimilation efficiency of (excess) C and P (DeMott et  
80 al., 1998). Furthermore, daphnids may compensate for poor food quality by increasing C  
81 excretion (He and Wang, 2008) and respiration (Darchambeau et al., 2003; Jensen and  
82 Hessen, 2007). Unfortunately, food quality aspects based on the biochemical composition of  
83 the diet are missing in these studies. However, it is important to take food's biochemical  
84 composition into account because the incorporation of carbon into proteins, lipids and  
85 polysaccharides depends on it (Thor et al., 2002). Consequently, our purpose was to improve  
86 our knowledge of the processes that regulate carbon budgets for compounds such as sterols.  
87 Such information will be essential to understand the homeostatic regulation of sterols in  
88 daphnids (Sperfeld and Wacker, 2009), particularly because sterols (and other essential  
89 biochemical food components) contain C and are consequently part of the overall C pool of  
90 the animals. If *Daphnia* was not able to spare carbonic sterols from C losses by egestion of  
91 faeces, excretion and respiration, the elimination of excess carbon would be useless or even  
92 detrimental. Therefore, we hypothesize the ability of *Daphnia* to selectively exclude sterols  
93 from C losses.

94 In this study, we acclimated *Daphnia magna* to different regimes of food quantity and  
95 biochemical quality (cholesterol) and examined their C budgets by measuring egestion,

96 excretion and respiration using the radiolabelled C method. Cholesterol budgeting was tested  
97 using radiolabelled cholesterol. We predicted that cholesterol would be spared from C losses  
98 (faeces egestion, excretion and respiration) when the animals fed on cholesterol-deficient  
99 diets.

## 101 **Results**

102 *Somatic growth* – The growth of *D. magna* was limited by food quantity as well as food  
103 quality in terms of dietary cholesterol (Fig. 1, 2-way-ANOVA, *cholesterol*:  $F_{1,8} = 607.2$ ,  $p <$   
104  $0.001$ , *food quantity*:  $F_{1,8} = 510.7$ ,  $p < 0.001$ ). When the cholesterol concentration and food  
105 quantity was high (HC / HQ) daphnids reached the highest growth rate ( $p < 0.001$ , Tukey  
106 HSD). If either the quantity or the cholesterol content of food was low, growth rates of  
107 *Daphnia* were reduced to the same moderate value (which apparently depends on the  
108 particular combination of cholesterol deficiency and food quantity limitation). At high food  
109 quantity (HQ), a low cholesterol concentration (LC) caused a strong decrease of *Daphnia*  
110 growth rate by 50% compared to growth under HC / HQ. In contrast, when food quantity was  
111 low (LQ), a low food quality (LC) led to a decrease in growth of only 37% compared to  
112 growth under HC / LQ (ANOVA, 2-way-interaction, *cholesterol*  $\times$  *food quantity*:  $F_{1,8} =$   
113  $111.5$ ,  $p < 0.001$ ). When both, food quantity and cholesterol concentration were reduced  
114 simultaneously (LC / LQ) the growth rate was lowest.

115  
116 *Pulse-chase feeding experiment* – In general, nearly all of the measured processes of  
117 *Daphnia* carbon budgets were affected by the quantity of the food and its cholesterol  
118 concentration (two-way ANOVAs in Tab. 2). Excretion was the exception. Interestingly,  
119 neither food quantity nor food quality significantly affected C excretion in *Daphnia*, although

120 there was a marginal effect of cholesterol. The absolute values of measurements are displayed  
121 in supplementary material Table S1.

122 *Assimilation efficiency, faeces and gross growth efficiency* – Carbon assimilation  
123 efficiency ( $AE_C$ ) was strongly affected by both, food quantity and dietary cholesterol  
124 concentration (Tab. 2, Fig. 2). When the food quantity was low (LQ), the  $AE_C$  was highest  
125 and did not differ between high (HC) and low cholesterol (LC) (LC / LQ:  $82.7 \pm 4.6\%$ ; HC /  
126 LQ:  $88.6 \pm 3.5\%$ , mean  $\pm 1$  SD,  $n = 5$ ). However, at high food quantity (HQ),  $AE_C$  was  
127 generally lower and, additionally, it varied between high and low dietary cholesterol  
128 concentrations. Hence, we found lowest  $AE_C$  when cholesterol was low and food quantity  
129 high (LC / HQ:  $50.7 \pm 3.1\%$ ; HC / HQ:  $67.9 \pm 7.9\%$ ). This pattern of  $AE_C$  led to concordant  
130 results of faeces measurements and gross growth efficiencies ( $GGE_C$ ) calculations (Fig. 2). In  
131 agreement with the high  $AE_C$  at low food quantity, the egestion of faeces was low and did not  
132 differ between cholesterol concentrations. In contrast, at high food quantity, low dietary  
133 cholesterol resulted in a high egestion of faeces (Fig. 2). Hence, when *Daphnia* had high food  
134 quantity, the  $GGE_C$  decreased at low cholesterol. In contrast, the  $GGE_C$  did not differ between  
135 both food qualities and was generally higher at low food quantity (Fig. 2).

136 *Net growth efficiency, excretion and respiration* – The carbon net growth efficiency  
137 ( $NGE_C$ ), which contains information about the proportion of assimilated carbon used for  
138 production, showed a similar pattern as the  $GGE_C$  when food quantity and the cholesterol  
139 concentration in the food were changed (Fig. 3). At low food quantity, the  $NGE_C$  was high  
140 and not different between both cholesterol concentrations. At high food quantity, daphnids  
141 reached the same high  $NGE_C$  when cholesterol was non-limiting. In contrast to the results at  
142 low quantity, a lower cholesterol concentration led to a lower  $NGE_C$  when food quantity was  
143 high. In the latter scenario, we found an increased respiration at low dietary cholesterol and  
144 high food quantity (Fig. 3). At low food quantity this effect of food quality on respiration was

145 not present. The excretion rates of *Daphnia* were not significantly affected either by the food  
146 quantity, or by the cholesterol concentration in the food (Tab. 2). Nevertheless, we found a  
147 marginal increase in excretion rate at low food quality (two-way ANOVA  $p = 0.073$ ).

148  
149 *Cholesterol in carbon budgets* – Compared to assimilation efficiencies (AE) of bulk carbon  
150 at high quantity (Fig. 2), the AE of cholesterol were high (c. 86%) and did not differ between  
151 the two cholesterol concentrations (Fig. 4). Accordingly, the egestion of faeces was low at  
152 both concentrations, which resulted in high, non-varying gross growth efficiencies  
153 (production per ingestion) for cholesterol. Furthermore, the proportion of assimilated  
154 cholesterol used for production (net growth efficiency) was high, indicating respiration losses  
155 that were lower and even negligible compared to bulk carbon losses. The only significant  
156 effects of the dietary cholesterol concentration on the direct cholesterol metabolism were  
157 those on the excretion, which was higher at low dietary cholesterol compared to the non-  
158 limiting concentration (Fig. 4, one-way-ANOVA,  $F_{1,4} = 3.2$ ,  $p = 0.022$ ).

## 160 Discussion

161 The present study revealed strong effects of sterol availability and food quantity on C  
162 assimilation and faeces egestion as well as respiration in *Daphnia*. Moreover, we found that  
163 *Daphnia* selectively exclude cholesterol from C losses such as faeces egestion and respiration.  
164 In the following we discuss the different C pathways in each of our four treatments and use  
165 the high cholesterol (HC) – high quantity (HQ) treatment as a reference.

### 167 *High cholesterol – high quantity*

168 In general, we produced evidence that food quality effects strongly depend on food quantity,  
169 since *Daphnia* growth reduction due to cholesterol limitation was diminished at low food



170 quantity. The HC-HQ treatment had the highest growth rates of *Daphnia*, which is consistent  
171 with recent results (Sperfeld and Wacker, 2009; Lukas et al., 2011). Moreover, the results for  
172 almost all measured C pathways of the present study (Fig. 5a) were similar to previous  
173 experiments with *Daphnia* grown under non-limiting food conditions (neither quantitatively  
174 nor qualitatively). Accordingly, we found comparable values for carbon assimilation  
175 efficiencies ( $AE_C$ ), carbon gross growth efficiencies ( $GGE_C$ , production per ingestion) and  
176 carbon net growth efficiency (production per assimilation,  $NGE_C$ ) (DeMott et al., 1998; He  
177 and Wang, 2008) as well as for respiration (Fedorov and Sorokin, 1967; He and Wang, 2006)  
178 and excretion of dissolved organic carbon (DOC) (Darchambeau et al., 2003; He and Wang,  
179 2006). Only the results for the  $AE_C$  were somewhat contrasting, since we (and DeMott et al.,  
180 1998) showed high values, but He and Wang (2008) obtained much lower  $AE_C$  (indicating  
181 low and high faeces egestion, respectively). These differences in  $AE_C$  might be due to  
182 differences in food concentrations (DeMott et al., 2010), but the food concentration in our  
183 study and those from He and Wang (2008) were more similar than those of DeMott et al.  
184 (1998). Moreover,  $AE_C$  might be age dependent, because animals from He and Wang (2008)  
185 were much older (11 d) and had already transferred energy to their offspring with energy. In  
186 any case, we clearly show here that faeces egestion is a non-negligible fraction of C ingested  
187 – even under good food conditions. In contrast with green algae, the cyanobacteria *S.*  
188 *elongatus* we used do not have cell walls and is well digestible (Lampert, 1977). If *Daphnia*  
189 food supply consisted instead of green algae with strong cell walls (e.g., Van Donk et al.,  
190 1997) or gelatinous coverings that reduce digestibility (DeMott et al., 2010), faeces egestion  
191 might have been more pronounced. Unfortunately, it is not well described, until now, how  
192 limitations of food quality (and quantity) affect *Daphnia*'s egestion of faeces (neither  
193 independently, nor simultaneously). This knowledge gap shows how the defecation processes  
194 in daphnids has been neglected as an important part in the regulation of C budgets.

195

196 *High cholesterol – low quantity*

197 When we reduced the food quantity and kept food quality high (HC-LQ treatment), the  
198 growth of the animals decreased significantly to a moderate level. At low food quantity the  
199 reduced ingestion at low food quantity was partly offset by increased  $AE_C$  (Fig. 5b); the  
200 higher  $AE_C$  probably derives from longer gut passage times at low food concentration  
201 (DeMott et al., 2010). Our results of very high  $AE_C$  at low food quantity corroborate earlier  
202 studies, which found higher  $AE_C$  at low food concentrations compared to high food levels  
203 (Urabe and Watanabe, 1991; He and Wang, 2006). The faeces fraction was much smaller  
204 under food limitation and therefore, it appears as a relatively minor route of C loss in energy-  
205 limited *Daphnia* (He and Wang, 2006). However, a modelling approach by Anderson et al.  
206 (2005) did not reveal lower faeces egestion at food limitation.

207 Interestingly, the  $GGE_C$  increased markedly when food concentration decreased, but the  
208  $NGE_C$  did not change. Consequently, we suggest that in both low quantity treatments the  
209 efficiency from assimilation to production is very high. Our low food concentration was  
210 clearly limiting, but still provided enough energy for moderate growth. Therefore, our  
211 interpretation of the high values of  $GGE_C$  and  $NGE_C$  cannot be generalized to situations  
212 where food quantity approaches the threshold for zero growth. Then, the entire assimilated C  
213 is consumed as metabolic expenditure, and gross (and net) growth efficiency approaches zero  
214 (Lampert, 1977). Above such threshold concentrations, animals appear to respond differently  
215 to food limitation; we found still high  $NGE_C$  which might originate from a very low excretion.  
216 As excretion of DOC did not change due to altered food quantity (see also He and Wang,  
217 2006), we assume low respiration as another potential explanation for our high  $NGE_C$  in the  
218 HC-LQ treatment. In comparisons with the HC-HQ treatment, HC-LQ respiration values were  
219 not significantly different, but, consistent with earlier studies, our results show a generally

220 decreased respiration at lower food availability (food quantity effect in two-way ANOVA,  
221 Tab. 2) (Lampert, 1986; Schmoker and Hernandez-Leon, 2003; Anderson et al., 2005). This  
222 response of the respiratory rate to changing food conditions (termed 'specific dynamic action':  
223 SDA) refers to the increase in energy expenditure that occurs during meal digestion (e.g.,  
224 Kiørboe et al., 1985; Secor, 2009).

#### 225 226 *Low cholesterol – high quantity*

227 When carbon was available in excess relative to cholesterol (LC-HQ treatment) the growth  
228 rates of *Daphnia* were reduced to the same moderate value as in the high cholesterol (HC) –  
229 low quantity (LQ) treatment. This indicates that ecologically relevant changes in food  
230 quantity and quality (in terms of cholesterol) can potentially have a similar impact on  
231 *Daphnia*, although this certainly depends on the particular combination of cholesterol  
232 deficiency and how much the food quantity is reduced below the incipient limiting level. The  
233 comparable responses of growth rates under food quantity or quality limitation, however,  
234 were not based on similar mechanisms. Instead they were the result of changes in C pathways.

235 In general, by using cholesterol as food quality indicator, the present study differs from  
236 previous studies examining the effect of P limitation on *Daphnia* C pathways. We conclude  
237 that *Daphnia* has a complex network of regulatory mechanisms for different types of  
238 limitations, i.e. we suggest that different strategies are used to handle limitations by  
239 cholesterol and elemental P. Interestingly, two important studies on C budgets in *Daphnia*,  
240 when dietary P supply was changed, differed in their results (DeMott et al., 1998; He and  
241 Wang, 2008) and make comparisons difficult. Since we did not address P supply, in the  
242 following we focus on the biochemical scope of our study.

243 We found lowest  $AE_C$  at low food quality and high quantity (Fig. 5c) which confirmed the  
244 results of DeMott and Müller-Navarra (1997) who found reduced  $AE_C$  for *Daphnia* feeding

245 on the cyanobacterium *Synechococcus elongatus* alone, but higher  $AE_C$  when *S. elongatus*  
246 was provided in combination with a green algae of high food quality. Low  $AE_C$  in the present  
247 study led to high egestion of faeces stressing the importance of faeces egestion in *Daphnia* C  
248 budgets, i.e. *Daphnia* uses faeces as a highly effective means to get rid of excess C when food  
249 quality, in terms of cholesterol, is limiting. In correspondence with low  $AE_C$  and high faeces  
250 egestion, we found the lowest  $GGE_C$  at high food quantity but low cholesterol availability.  
251 Low  $GGE_C$  and high faeces egestion at low food quality were supported by DeMott et al.  
252 (1998), but not by He and Wang (2008). The latter showed longer gut passage times for P-  
253 limited animals, a fact that suggests lower faeces egestion.

254 We also found the lowest  $NGE_C$  at limiting cholesterol concentrations compared to our  
255 other treatments. Low  $NGE_C$  could be the result of high DOC excretion, which can be the  
256 predominant component of C release under P-limited conditions (Darchambeau et al., 2003;  
257 Anderson et al., 2005; He and Wang, 2008). However, in contrast to results for P-deficient  
258 diets, we did not find significant effects of cholesterol on the excretion of DOC. This clearly  
259 indicates that *Daphnia* responds differently to biochemical limitation such as cholesterol,  
260 compared to P limitation. At any rate, our data suggest a marginal increase in excretion rate as  
261 a mechanism to get rid of excess C at low food quality in terms of biochemicals, e.g., sterols  
262 (two-way ANOVA, effect of cholesterol on DOC excretion:  $p = 0.073$ ). Nevertheless, care  
263 should be taken when interpreting excretion data, as one has to distinguish between direct  
264 excretion of DOC and the release of DOC from faecal material. He and Wang (2006)  
265 suggested that faeces leakage was only a small fraction of total DOC release. Our results are  
266 consistent with this, because we did not find a correlation between the proportions of faeces  
267 and excretion (linear regression,  $R^2 = 0.14$ ,  $p = 0.12$ ). Hence we assume leakage of faeces into  
268 the DOC pool was negligible. A further reason for *Daphnia*'s low  $NGE_C$  in our study, is  
269 certainly the strong increase in respiration when cholesterol was low, as previously shown for

270 *Daphnia* fed with P-limited diets (Darchambeau et al., 2003; Jensen and Hessen, 2007).  
271 Nevertheless, the results of Jensen and Hessen (2007) are not directly comparable with ours  
272 and those of Darchambeau et al. (2003). The differences may stem from different methods of  
273 determination of respiration rates, i.e., consumption of O<sub>2</sub> (Jensen and Hessen, 2007) vs.  
274 release of <sup>14</sup>CO<sub>2</sub> (Darchambeau et al. (2003) and present study). The respiratory quotient  
275 (defined as the volume of CO<sub>2</sub> produced per volume of O<sub>2</sub> consumed) will be affected by the  
276 biochemical make-up of the algal food (Jensen and Hessen, 2007).

#### 277 278 *Low cholesterol – low quantity*

279 When *Daphnia* was grown in the worst food treatment (low quantity and quality, LC-LQ)  
280 the patterns in C pathways were not different from the HC-LQ treatment. Accordingly,  
281 *Daphnia* C pathways are not affected by food quality (in terms of cholesterol) as long as food  
282 quantity is also limiting. As carbon and cholesterol assimilation efficiencies were high in both  
283 low quantity treatments (LC-LQ and HC-LQ), the animals grew better at higher cholesterol  
284 availability (HC-LQ) than at lower cholesterol availability (LC-LQ).

285 The C losses of *Daphnia* are reduced by decreasing all C costly processes such as  
286 excretion, respiration and faeces egestion (Fig. 5d). Less egestion of faeces is probably the  
287 result of low ingestion rate and slow gut passage at low food concentration. To our  
288 knowledge, the present study is the first to show concurrent effects of low food quantity and  
289 quality on *Daphnia* and how animals adjust C budgets and regulate growth in response to it.  
290 We illustrate the dilemma of animals to adjust C budgets for low quality at low quantity.  
291 When food quantity was high, *Daphnia* was able to adjust C pathways for differences in  
292 dietary cholesterol (e.g., by higher faeces egestion or respiration), but the constraints imposed  
293 by low food quantity superseded other possible adjustments due to low food quality.

294

295 *Pathways of essential organic compounds*

296 Until now, discussions on the regulation of zooplankton C pathways have focused on bulk  
297 carbon, but here we start investigating the pathways of essential biochemical compounds. The  
298 pathways of bulk carbon differ significantly from those of cholesterol. We found the  
299 assimilation efficiency for bulk carbon ( $AE_C$ ) to be lowest at low cholesterol concentrations,  
300 but the assimilation efficiencies of cholesterol itself were much higher. Thus, our results show  
301 a strong retention of this essential food compound which increases our knowledge about the  
302 reaction of *Daphnia* to low biochemical food quality. Comparable to our findings, recent  
303 results describe lower  $AE_C$  but higher assimilation efficiencies for P in P-limited *Daphnia*  
304 (e.g., DeMott et al., 1998). Only when we set cholesterol concentration to very high values  
305 (above  $55 \mu\text{g cholesterol mg C}^{-1}$ ) probably not found in nature, the AE of cholesterol  
306 decreased, and the excretion of cholesterol increased (60% and 30%, respectively). This  
307 response explains the accumulation and loss of cholesterol at low versus high cholesterol  
308 levels, respectively and enables *Daphnia* to maintain a suitable cholesterol concentration in  
309 the tissues (within ecological relevant scales c.  $5\text{-}10 \mu\text{g cholesterol mg C}^{-1}$ ) (Sperfeld and  
310 Wacker, 2009).

311 The egestion of bulk faeces increased when the cholesterol concentration in the food was  
312 low, but the egestion of cholesterol via faeces was very low. Accordingly, *Daphnia* achieved  
313 strong regulation (after ingestion) of this essential biochemical by improving low  
314 cholesterol:carbon ratios: (i) *Daphnia* increased egestion of excess C and (ii) simultaneously  
315 retained cholesterol from egestion. Due to low egestion and selective retention of cholesterol,  
316 approximately 80% of the ingested cholesterol was used for production. A similar value was  
317 found for the GGE of P when *Daphnia* fed P-limited algae (89%, DeMott et al., 1998).  
318 Interestingly, our NGEs for cholesterol were consistently high, while DeMott et al. (1998)  
319 found decreasing phosphorus NGEs for P-limited *Daphnia*. They explained this by a low, but

320 consistent, P excretion even in strongly P-limited *Daphnia*. Similarly, we found measurable  
321 cholesterol excretion even though cholesterol was limiting. Hence, the mechanism of higher  
322 DOC excretion to get rid of excess C at low cholesterol concentrations (as indicated in our  
323 study) seems to be inoperative. Consequently, excretion of C derived from essential carbonic  
324 compounds is not independent from bulk C excretion which is clearly in contrast to non-  
325 carbonic compounds such as minerals (Frost et al., 2004; He and Wang, 2008). As an  
326 explanation, we suggest that *Daphnia* does not distinguish between essential and non-  
327 essential carbon compounds in the excretion pathway: A higher excretion of excess C at low  
328 food quality simultaneously causes higher excretion of carbonic cholesterol.

329 In contrast, although our used isotope method provides a very sensitive measure we did not  
330 observe a detectable respiration of cholesterol; therefore cholesterol respiration is very low  
331 and not significantly different from zero. Hence, in addition to the faeces regulation, we found  
332 two further mechanisms by which *Daphnia* can improve low cholesterol:carbon ratios: they  
333 increase respiration of excess C while sparing cholesterol from respiration at the same time.  
334 With this conclusion we emphasize that many biochemical food components contain C and  
335 are consequently part of the overall C pool of the animals. Especially when these components  
336 are only a small part of the overall C content *Daphnia* should handle such carbonic essential  
337 molecules efficiently. This fact needs to be considered for analyses of C budgets, when  
338 essential food compounds that contain C are investigated. Additionally, co-limiting scenarios  
339 (e.g. co-limitation by cholesterol and phosphorus or by cholesterol and polyunsaturated fatty  
340 acids) lead to interactions between co-limiting nutrients (Lukas et al., 2011; Sperfeld et al.,  
341 2012) and consequently also C budgeting of co-limiting carbonic nutrients may interact. Such  
342 interactive effects on C budgeting of animals *in situ* might be identified by nutritional  
343 indicators (Wagner et al., 2013).

344 In conclusion, our results clearly indicate that *Daphnia* varies its regulation of C losses in  
345 response to different food conditions. In particular, the effects of food quality in terms of  
346 cholesterol are important in several C pathways, given that food quantity was non-limiting.  
347 This provides further evidence of stronger effects of food quality on zooplankton at non-  
348 limiting food quantity, which were previously described for growth only (see Sterner and  
349 Schulz, 1998). Moreover, increased discharge of bulk C and simultaneous high retention of  
350 cholesterol imply that *Daphnia* is able to adjust C budgets and achieve moderate growth rates  
351 at low cholesterol availability.

## 353 **Materials and methods**

354 *Organisms* – The stock culture of *Daphnia magna* was grown in filtered water (0.2  $\mu\text{m}$   
355 pore-sized membrane filter) of Lake Stechlin (northeast Germany) with 2 mg C L<sup>-1</sup> of the  
356 green algae *Scenedesmus obliquus* (SAG 276-3a, culture collection Goettingen, Germany) as  
357 food. For the growth experiment, the well ingestible, non-toxic and phosphorus saturated  
358 cyanobacterium *Synechococcus elongatus* was used as food for *D. magna*. *Synechococcus*  
359 *elongatus* (SYN, SAG 89.79), lacking sterols and polyunsaturated fatty acids (von Elert et al.,  
360 2003), was cultured in aerated 2-L flasks containing WC medium with vitamins (Guillard,  
361 1975) and diluted daily (dilution rate 0.2 day<sup>-1</sup>) in order to ensure nutrient repletion. The  
362 culture was maintained at an illumination of 40  $\mu\text{mol photons m}^{-2} \text{s}^{-1}$  using a 16 h:8 h  
363 light:dark cycle. All organisms were raised at 20°C.

364  
365 *Experimental design and procedure* – In order to examine the simultaneous dependency of *D.*  
366 *magna*'s growth and carbon (C) budgets on food quality and quantity we supplied *Daphnia*  
367 with two different dietary concentrations of cholesterol and two food concentrations in a full-  
368 factorial design (Tab. 1). The 'high quality' treatments provided enough cholesterol so that it



369 was not limiting (Sperfeld and Wacker, 2009) but not a substantial excess. We used liposomes  
370 loaded with cholesterol to control food quality (see Liposome preparation). Third-clutch  
371 juveniles used for the experiment were collected within 12 hours from mothers that were  
372 transferred to jars with cholesterol-deficient food (SYN, 2 mg C L<sup>-1</sup>) in the beginning of the  
373 12 hours. By doing so we avoided a temporally different cholesterol supply to newly hatched  
374 juveniles, and thus, a potentially confounding variation in cholesterol storage as previously  
375 shown for P (Lukas et al., 2013). A subset of these juveniles was dried and weighed for the  
376 determination of the initial dry mass.

377 The treatments with food quantity and/ or quality limitation started each with 320 neonates  
378 that were randomly distributed into eight replicate jars. For the treatment without any  
379 limitation, 160 neonates were used. In order to consider the different sizes of the daphnids and  
380 to avoid a depletion of food, the volumes of food suspension were adjusted as follows:  
381 animals with high food concentration were raised in jars containing between 30 mL per  
382 individual at the beginning and 60 mL per individual at the end of the experiment. Animals  
383 with low food concentration were raised in jars containing between 80 mL per individual at  
384 the beginning and 200 mL per individual at the end of the experiment. In order to do so, we  
385 used up to five 2000ml-jars for one replicate. Throughout the experiment, daphnids were  
386 transferred daily into jars with renewed food suspensions. The growth experiment was  
387 terminated after five, or six days for high food quantity (HQ) and low food quantity (LQ)  
388 respectively, in order to allow animals with LQ to reach a size comparable to animals with  
389 HQ. The daphnids of each treatment were split into two groups. One group (five replicates)  
390 was used for the pulse-chase feeding experiment (see below). The remaining daphnids (three  
391 replicates) were rinsed with ultrapure water and transferred into pre-weighed aluminium  
392 boats. After drying for 48 hours at 50°C daphnids were weighed on an electronic balance ( $\pm 1$   
393  $\mu\text{g}$ ; CP2P, Sartorius, Goettingen, Germany). The somatic growth rates ( $g$ ) were calculated as

394 the change in dry mass per individual from the beginning ( $DM_0$ ) to the end of the experiment  
395 ( $DM_t$ ) using the equation

$$396 \quad g = [\ln (DM_t) - \ln (DM_0)] \times t^{-1} \quad (1)$$

397 where  $t$  is the duration of the experiment in days.

398  
399 *Liposome preparation* – Cholesterol containing liposomes and empty liposomes without

400 further ingredients were prepared according to Wacker and Martin-Creuzburg (2012).

401 Cholesterol liposomes were used as food supplements in growth experiments and during

402 pulse-chase feeding experiment. The overall C content of the liposome solution (liposomes

403 plus cholesterol in buffer) was  $2 \text{ mg C ml}^{-1}$ . Accordingly to the supplemented volumes of

404 liposomes (low cholesterol:  $10 \text{ } \mu\text{l liposomes mgC}^{-1}$ , high cholesterol:  $50 \text{ } \mu\text{l liposomes mgC}^{-1}$ )

405 the C concentrations of the low quality treatments increased by 2%, those of the high quality

406 treatments by 10% (i.e., the C increase from low to high quality accounted for 8% each). This

407 additional C could be considered negligible when compared to the increase by 900% when

408 food quantity was changed from low to high concentrations. The amount of cholesterol in

409 subsamples of liposomes was determined using gas chromatography according to Martin-

410 Creuzburg et al. (2009). For the calculation of carbon based cholesterol concentrations, the

411 amount of cholesterol added by liposomes was related to the POC concentrations of *S.*

412 *elongatus* in food suspensions. To obtain radiolabelled cholesterol liposomes we loaded

413 empty liposomes with radiolabelled ( $^{14}\text{C}$ ) cholesterol (American Radiolabeled Chemicals Inc.,

414 St. Louis, United States of America); empty liposomes were sonicated for 15 min, followed

415 by one hour incubation with  $^{14}\text{C}$ -cholesterol ( $50 \text{ mCi mmol}^{-1}$ ). Thereto we added  $^{14}\text{C}$ -

416 cholesterol in the same concentration also used for the non-radiolabelled cholesterol

417 liposomes ( $333 \text{ } \mu\text{g ml}^{-1}$ ). To verify the efficient incorporation of  $^{14}\text{C}$ -cholesterol into the

418 liposomes, we filtered the reassembled liposomes on Nucleopore filters ( $0.2 \text{ } \mu\text{m}$ ,  $25 \text{ mm}$ ,

419 Whatman International Ltd, Maidstone, United Kingdom). Less than 5% of the initial  $^{14}\text{C}$ -  
420 cholesterol concentration was detected in the filtrate and more than 95% in the reassembled  
421 liposomes on the filter.

422  
423 *Pulse-chase feeding experiment* – In order to investigate the carbon budgets of *D. magna*  
424 we used the radiotracer technique (radioactive labelled carbon;  $^{14}\text{C}$ ) to follow the allocation of  
425 carbon into different compartments including respiration of dissolved inorganic carbon (DIC),  
426 excretion of dissolved organic carbon (DOC) and egestion of particulate organic carbon  
427 (POC) as faeces.

428 Exponentially growing SYN was labelled with  $^{14}\text{C}$  from  $\text{NaH}^{14}\text{CO}_3$  ( $1 \text{ mCi L}^{-1}$ ) until cells  
429 were uniformly radiolabelled after four days (specific radioactivity of  $2.3\text{-}2.6 \times 10^7 \text{ dpm mg}$   
430  $\text{C}^{-1}$ ). Before using them as diet, the food suspension was supplemented with liposomes  
431 containing cholesterol according to the experimental protocol (Tab. 1).

432 For the pulse-chase feeding experiment *D. magna* was previously acclimated on non-  
433 radiolabelled experimental diets (see experimental design and procedure) and then exposed to  
434 the radiolabelled diets (five-times replicated) for 5 min (pulse). This is expected to be much  
435 shorter than the gut passage time of about 10-15 min and avoids the defecation of  
436 radiolabelled faeces (He and Wang, 2008). After such pulse feeding, the animals were rinsed  
437 with radioactive-free medium and transferred into non-radiolabelled experimental food  
438 suspensions (chase) under dim light using completely filled 5 mL snap cap vials. During pulse  
439 and chase phases food suspensions had the same quantity and quality characteristics as during  
440 the growth experiment. To avoid recycling of  $^{14}\text{C}$  (e.g., re-uptake by daphnids) daphnids were  
441 rinsed with radioactive-free medium to avoid a carry-over of  $^{14}\text{C}$  and were transferred into  
442 vials with new food suspension in regular time intervals (after 0.5, 1, 2, 4 and 6 hours). Using  
443 a preliminary test (see supplementary material, Fig. S1) we concluded that *Daphnia* stopped

444 the incorporation of  $^{14}\text{C}$  into the somatic tissue after six hours for which reason we confined  
445 our measurements to this time. To measure the amount of egested, excreted and respired  $^{14}\text{C}$   
446 during each time interval subsamples of the food suspension including faeces (total fraction)  
447 were taken immediately after each time interval and the activity was instantly determined via  
448 liquid scintillation counting (0.5 mL sample + 2.5 mL Hionic Fluor scintillation fluid in liquid  
449 scintillation counter Tri-Carb 2810Tr, both PerkinElmer). The external standard ratio method  
450 was used for quenching and conversion from counts per minute (cpm) to disintegrations per  
451 minute (dpm) was corrected. By different fractionation we gained information about the  
452 amount of faeces egested (particulate organic carbon,  $\text{PO}^{14}\text{C}$ ), respired  $^{14}\text{CO}_2$  and excreted  
453 dissolved organic carbon ( $\text{DO}^{14}\text{C}$ ). Therefore, the radioactivity in the total fraction  
454 ( $\text{DI}^{14}\text{C} + \text{DO}^{14}\text{C} + \text{PO}^{14}\text{C}$ ) was measured directly, and after addition of hydrochloric acid (100  $\mu\text{l}$   
455 1 N HCl in 4 mL of the sample) plus bubbling with air. By adding HCl dissolved inorganic  
456 carbon ( $\text{DI}^{14}\text{C}$ ) was all dehydrated to  $^{14}\text{CO}_2$ , which out gassed; dissolved organic carbon  
457 ( $\text{DO}^{14}\text{C}$ ) and particulate organic carbon ( $\text{PO}^{14}\text{C}$ ) remained in the solution ( $\text{DO}^{14}\text{C} + \text{PO}^{14}\text{C}$ -  
458 fraction). Radioactivity of this fraction was measured. Subsamples of the  $\text{DO}^{14}\text{C} + \text{PO}^{14}\text{C}$ -  
459 fraction were membrane filtered (2 mL), and the retained particles on membrane filter were  
460 transferred into scintillation vials. After the filter was dissolved in 0.5 mL Soluene 350  
461 (PerkinElmer, Rodgau, Germany) the radioactivity of particulate carbon ( $\text{PO}^{14}\text{C}$ ) was  
462 determined. This particulate fraction was used as a measure for the faeces, because algal  
463 carbon in chase suspensions was not labelled with  $^{14}\text{C}$ . We ensured that bubbling the total  
464 fraction with air had no influence on the amount of measured faeces, since we found no  
465 differences between the aerated und unaerated  $\text{PO}^{14}\text{C}$  fractions (two sample t-test,  $t = 1.03$ ,  $\text{df}$   
466  $= 198$ ,  $p = 0.31$ ). By using the difference between the total fraction ( $\text{DI}^{14}\text{C} + \text{DO}^{14}\text{C} + \text{PO}^{14}\text{C}$ )  
467 and the  $\text{DO}^{14}\text{C} + \text{PO}^{14}\text{C}$ -fraction the  $\text{DI}^{14}\text{C}$  (= respiration) was calculated. The  $\text{DO}^{14}\text{C}$  (=

468 excretion) was calculated as the difference between the  $\text{DO}^{14}\text{C} + \text{PO}^{14}\text{C}$ -fraction and the  
469  $\text{PO}^{14}\text{C}$ -fraction.

470 Immediately after the pulse-feeding (5 min) and after the last time interval (6 h)  
471 subsamples of the daphnids were taken; ten animals each for the treatment without any  
472 limitation and 20 animals for each treatment with food quantity and/ or quality limitation.  
473 Then animals were instantly digested in solubilizer (0.5 mL Soluene 350) and the activity  
474 determined via liquid scintillation counting. The measurement of animals after the pulse-  
475 feeding was used as value for ingested  $^{14}\text{C}$ . After six hours we assumed that the measured  $^{14}\text{C}$   
476 in the animals was used for biomass production. We calculated the amount of carbon in each  
477 fraction by dividing the amount of measured  $^{14}\text{C}$  by the ratio between  $^{14}\text{C}$  and bulk carbon  
478 that was found in the radiolabelled diet. Resulting values were related to the carbon content of  
479 the animals which was calculated by using the determined dry mass of an unlabelled  
480 subsample of the daphnids and a previously determined conversion factor of  $0.41 \mu\text{g C per } \mu\text{g}$   
481 dry mass.

482  
483 *Cholesterol in carbon budgets* – To follow the fate of the biochemical in the measured C  
484 pathways and test the hypothesis of cholesterol exclusion from C budgeting we ran a separate  
485 experiment and used radiolabelled cholesterol (in liposomes, see Liposome preparation) and  
486 the sterol-free cyanobacteria SYN. Using eukaryotic diets instead (e.g., green algae) would be  
487 problematic as these contain phytosterols that are radiolabelled by incorporating bulk  $^{14}\text{C}$   
488 derived from  $\text{NaH}^{14}\text{CO}_3$  incubation. Consequently, the  $^{14}\text{C}$  signal of phytosterols and of other  
489 C compounds in the different C fractions of *Daphnia* would not have been separated from  
490 each other. Juvenile daphnids (three replicates, 32 animals each) were acclimated on two  
491 different cholesterol concentrations (low:  $3.5 \mu\text{g cholesterol mg C}^{-1}$ , high:  $14 \mu\text{g cholesterol}$   
492  $\text{mg C}^{-1}$ ) for 48 h and then used for a pulse chase feeding experiment accordingly to the

493 explanations above, except that radiolabelled cholesterol (in liposomes) was used during the  
494 pulse part instead of bulk  $^{14}\text{C}$ . We assumed a homogeneous distribution of the radiolabelled  
495 liposomes in the prepared food suspensions and, accordingly, assumed *Daphnia*'s food to be  
496 uniformly labelled. The  $^{14}\text{C}$  measured afterwards in each fraction was directly derived from  
497  $^{14}\text{C}$ -cholesterol. Furthermore, we assumed that the acclimation periods to sterol-limited  
498 conditions (48 h for the experiment with radiolabelled cholesterol as well as 5-6 days for the  
499 experiment with radiolabelled bulk carbon) are appropriate time scales for detecting  
500 differences in C pathways due to cholesterol limitation, though different times of acclimation  
501 to the limitation may have influenced the experimental outcome.

502  
503 *Statistical analysis* – The dependency of *Daphnia*'s growth rate on high/low food quantity  
504 as well as high/low cholesterol was analysed using a full-factorial two-way analysis of  
505 variance (two-way ANOVA). We also analysed the influence of the different food conditions  
506 on the carbon budgets of the animals. Therefore, we calculated the proportions of assimilation  
507 (= ingestion – faeces), faeces and production of ingestion and the proportions of production,  
508 excretion and respiration of assimilation. We defined carbon assimilation efficiency ( $\text{AE}_\text{C}$ ) =  
509 assimilation / ingestion, carbon gross growth efficiency ( $\text{GGE}_\text{C}$ ) = production / ingestion and  
510 carbon net growth efficiency ( $\text{NGE}_\text{C}$ ) = production / assimilation. For the analysis of variance  
511 proportions were transformed by arcsine-square root and the significance of differences  
512 among means was tested using multiple comparisons (Tukey post-hoc test). All statistical  
513 analyses were carried out using the statistical software package R version 2.5.1 (R  
514 Development Core Team, 2007).

515  
516 **Acknowledgements**

517 We thank Y. Jessen and especially S. Heim for technical assistance and B. Lischke for  
518 helpful discussions. We also thank two anonymous reviewers for valuable comments on this  
519 manuscript and appreciate linguistic improvements by Adisel Montana and Francisco de  
520 Castro.

521

### 522 **Competing interests**

523 No competing interests declared.

524

### 525 **Author contributions**

526 Both authors contributed significantly to the conception, design and execution of the study,  
527 interpretation of the findings as well as drafting the article.

528

### 529 **Funding**

530 The study was supported by the German Research Foundation (DFG, WA 2445/5-1).

531 **Tab. 1** Conditions used during the growth and pulse chase experiment. We used a cross-way  
532 scheme of concentrations of dietary cholesterol and food quantity.

| Treatment                                  | Cholesterol                  | Food quantity            |
|--------------------------------------------|------------------------------|--------------------------|
| low cholesterol – low quantity (LC / LQ)   | 3.5 $\mu\text{g mg C}^{-1}$  | 0.2 mg C L <sup>-1</sup> |
| low cholesterol – high quantity (LC / HQ)  | 3.5 $\mu\text{g mg C}^{-1}$  | 2 mg C L <sup>-1</sup>   |
| high cholesterol – low quantity (HC / LQ)  | 17.5 $\mu\text{g mg C}^{-1}$ | 0.2 mg C L <sup>-1</sup> |
| high cholesterol – high quantity (HC / HQ) | 17.5 $\mu\text{g mg C}^{-1}$ | 2 mg C L <sup>-1</sup>   |

533



534 **Tab. 2** Two-way ANOVA on the effect of food quality (cholesterol) and food quantity on  
 535 several carbon pathways of *D. magna*. AE = Assimilation efficiency, GGE = Gross growth  
 536 efficiency, NGE = Net growth efficiency.

| Proportion (Efficiency)        | Cholesterol |                   | Food quantity |                   | Interaction |              |
|--------------------------------|-------------|-------------------|---------------|-------------------|-------------|--------------|
|                                | $F_{1,16}$  | $P$               | $F_{1,16}$    | $P$               | $F_{1,16}$  | $P$          |
| Assimilation/ ingestion (AE)   | 24.4        | <b>&lt; 0.001</b> | 130.8         | <b>&lt; 0.001</b> | 3.1         | 0.097        |
| Faeces/ ingestion              | 15.0        | <b>0.001</b>      | 54.6          | <b>&lt; 0.001</b> | 4.6         | <b>0.048</b> |
| Production/ ingestion (GGE)    | 5.4         | <b>0.033</b>      | 63.1          | <b>&lt; 0.001</b> | 12.5        | <b>0.003</b> |
| Production/ assimilation (NGE) | 3.5         | 0.079             | 13.3          | <b>0.002</b>      | 8.0         | <b>0.012</b> |
| Excretion/ assimilation †      | 3.7         | 0.073             | 2.2           | 0.16              | 0.8         | 0.39         |
| Respiration/ assimilation      | 7.9         | <b>0.013</b>      | 33.1          | <b>&lt; 0.001</b> | 9.5         | <b>0.007</b> |

537 † df = 15

538 **Fig. 1** Somatic growth rates (mean  $\pm$  1 SD,  $n = 3$ ) of *D. magna* with food of different quality  
539 and quantity (LC: low cholesterol, HC: high cholesterol, LQ: low food quantity, HQ: high  
540 food quantity). Statistically significant differences are indicated as different letters (Tukey  
541 post Hoc test,  $p < 0.001$ ).

542  
543 **Fig. 2** Carbon assimilation efficiency (assimilation per ingestion), faeces egestion (per  
544 ingestion) and gross growth efficiency (GGE, production per ingestion) of *D. magna* (mean  $\pm$   
545 1 SD,  $n = 5$ ) with food of different quality and quantity (LC: low cholesterol, HC: high  
546 cholesterol, LQ: low food quantity, HQ: high food quantity). Statistically significant  
547 differences are indicated as different letters (Tukey post Hoc test,  $p < 0.05$ ).

548  
549 **Fig. 3** Net growth efficiency (production per assimilation), excretion and respiration (both as  
550 proportions of assimilation) of *D. magna* with food of different quality (cholesterol) and  
551 quantity (LC: low cholesterol, HC: high cholesterol, LQ: low food quantity, HQ: high food  
552 quantity). Error bars denote means  $\pm$  1 SD with  $n = 5$ , except for excretion at HC / LQ:  $n = 4$ .  
553 Statistically significant differences are indicated as different letters (Tukey post Hoc test,  $p <$   
554 0.05).

555  
556 **Fig. 4** Cholesterol assimilation efficiency (cholesterol assimilation per ingestion), cholesterol  
557 egestion (faeces per ingestion), cholesterol gross growth efficiency (production per ingestion),  
558 cholesterol net growth efficiency (production per assimilation) and excretion and respiration  
559 of cholesterol (as proportions of assimilation) of *D. magna* (mean  $\pm$  1 SD,  $n = 3$ ) acclimated  
560 (48 h) to two different cholesterol concentrations (SYN, 2 mg C L<sup>-1</sup>). Except for excretion  
561 (one-way ANOVA,  $F_{2,6} = 13.2$ ,  $p = 0.022$ ) all remaining one-way ANOVAs revealed no  
562 differences between low and high dietary cholesterol ( $p > 0.85$ ).

563

564 **Fig. 5** Schematic summary of C pathways in *D. magna* grown at different food conditions.

565 The thickness of the arrows indicates the relative value of the respective C pathways

## References

- Andersen, T.** (1997). Pelagic nutrient cycles. Ecological studies. Berlin: Springer Verlag.
- Anderson, T. R., Boersma, M., and Raubenheimer, D.** (2004). Stoichiometry: linking elements to biochemicals. *Ecology* **85**, 1193-1202.
- Anderson, T. R., Hessen, D. O., Elser, J. J., and Urabe, J.** (2005). Metabolic stoichiometry and the fate of excess carbon and nutrients in consumers. *American Naturalist* **165**, 1-15.
- Behmer, S. T. and Nes, W. D.** (2003). Insect sterol nutrition and physiology: A global overview. pp. 1-72. London: Academic Press Ltd.
- Crockett, E. L.** (1998). Cholesterol function in plasma membranes from ectotherms: membrane-specific roles in adaptation to temperature. *Am.Zool.* **38**, 291-304.
- Darchambeau, F., Faerøvig, P. J., and Hessen, D. O.** (2003). How *Daphnia* copes with excess carbon in its food. *Oecologia* **136**, 336-346.
- Darchambeau, F. and Thys, I.** (2005). In situ filtration responses of *Daphnia galeata* to changes in food quality. *J.Plank.Res.* **27**, 227-236.
- DeMott, W. R., Gulati, R. D., and Siewertsen, K.** (1998). Effects of phosphorus-deficient diets on the carbon and phosphorus balance of *Daphnia magna*. *Limnol.Oceanogr.* **43**, 1147-1161.
- DeMott, W. R., McKinney, E. N., and Tessier, A. J.** (2010). Ontogeny of digestion in *Daphnia*: implications for the effectiveness of algal defenses. *Ecology* **91**, 540-548.
- DeMott, W. R. and Müller-Navarra, D. C.** (1997). The importance of highly unsaturated fatty acids in zooplankton nutrition: evidence from experiments with *Daphnia*, a cyanobacterium and lipid emulsions. *Freshwat.Biol.* **38**, 649-664.
- Fedorov, V. K. and Sorokin, Y. J.** (1967). Determination of assimilation of algae, yeast and bacteria by some representative cladocera. *Reports of Academic Science of USSR* **174**, 969-970.
- Frost, P. C., Xenopoulos, M. A., and Larson, J. H.** (2004). The stoichiometry of dissolved organic carbon, nitrogen, and phosphorus release by a planktonic grazer, *Daphnia*. *Limnol.Oceanogr.* **49**, 1802-1808.
- Gaedke, U., Hochstädter, S., and Straile, D.** (2002). Interplay between energy limitation and nutritional deficiency: Empirical data and food web models. *Ecological Monographs* **72**, 251-270.
- Geller, W.** (1975). Die Nahrungsaufnahme von *Daphnia pulex* in Abhängigkeit von der Futterkonzentration, der Temperatur, der Körpergröße und dem Hungerzustand der Tiere. *Arch.Hydrobiol.Suppl.* **48**, 47-107.
- Gliwicz, Z. M. and Lampert, W.** (1990). Food thresholds in *Daphnia* species in the absence and presence of blue-green filaments. *Ecology* **71**, 691-702.

- Goad, L. J.** (1981). Sterol biosynthesis and metabolism in marine invertebrates. *Pure and Applied Chemistry* **53**, 837-852.
- Guillard, R. R. L.** (1975). Cultures of phytoplankton for feeding of marine invertebrates. In: *Culture of Marine Invertebrate Animals* (eds. Smith, W. L. and Chanley, M. H.), pp. 29-60. New York: Plenum.
- He, X. J. and Wang, W. X.** (2006). Releases of ingested phytoplankton carbon by *Daphnia magna*. *Freshwat.Biol.* **51**, 649-665.
- He, X. J. and Wang, W. X.** (2008). Stoichiometric regulation of carbon and phosphorus in P-deficient *Daphnia magna*. *Limnol.Oceanogr.* **53**, 244-254.
- Hessen, D. O. and Anderson, T. R.** (2008). Excess carbon in aquatic organisms and ecosystems: Physiological, ecological, and evolutionary implications. *Limnol.Oceanogr.* **53**, 1685-1696.
- Jensen, T. C. and Hessen, D. O.** (2007). Does excess dietary carbon affect respiration of *Daphnia*? *Oecologia* **152**, 191-200.
- Jeppesen, E., Jensen, J. P., Sondergaard, M., and Lauridsen, T.** (1999). Trophic dynamics in turbid and clearwater lakes with special emphasis on the role of zooplankton for water clarity. *Hydrobiologia* **408**, 217-231.
- Kjørboe, T., Møhlenberg, F., and Hamburger, K.** (1985). Bioenergetics of the planktonic copepod *Acartia tonsa*: relation between feeding, egg production and respiration, and composition of specific dynamic action. *Marine Ecology Progress Series* **26**, 85-97.
- Lampert, W.** (1977). Studies on the carbon balance of *Daphnia pulex* as related to environmental conditions. II. The dependence of carbon assimilation on animal size, temperature, food concentration and diet species. *Arch.Hydrobiol.Suppl.* **48**, 310-335.
- Lampert, W.** (1986). Response of the respiratory rate of *Daphnia magna* to changing food conditions. *Oecologia* **70**, 495-501.
- Lampert, W.** (2011). *Daphnia*: Development of a model organism in ecology and evolution. In: *Excellence in ecology*, vol. 21 (ed. Kinne, O.), Oldendorf/Luhe, Germany: International Ecology Institute.
- Lukas, M., Frost, P. C., and Wacker, A.** (2013). The neonate nutrition hypothesis: early feeding affects the body stoichiometry of *Daphnia* offspring. *Freshwat.Biol.* **58**, 2333-2344.
- Lukas, M., Sperfeld, E., and Wacker, A.** (2011). Growth Rate Hypothesis does not apply across colimiting conditions: cholesterol limitation affects phosphorus homeostasis of an aquatic herbivore. *Funct.Ecol.* **25**, 1206-1214.
- Martin-Creuzburg, D., Sperfeld, E., and Wacker, A.** (2009). Colimitation of a freshwater herbivore by sterols and polyunsaturated fatty acids. *Proceedings of the Royal Society B-Biological Sciences* **276**, 1805-1814.

- Martin-Creuzburg, D. and von Elert, E.** (2004). Impact of 10 dietary sterols on growth and reproduction of *Daphnia galeata*. *J.Chem.Ecol.* **30**, 483-500.
- Piepho, M., Martin-Creuzburg, D., and Wacker, A.** (2010). Simultaneous effects of light intensity and phosphorus supply on the sterol content of phytoplankton. *Plos One* **5**, e15828.
- Piepho, M., Martin-Creuzburg, D., and Wacker, A.** (2012). Phytoplankton sterol contents vary with temperature, phosphorus and silicate supply: a study on three freshwater species. *European Journal of Phycology* **47**, 138-145.
- R Development Core Team** (2007). R: A language and environment for statistical computing. R Foundation for Statistical Computing, version 2.5.1.
- Raubenheimer, D. and Simpson, S. J.** (2004). Organismal stoichiometry: quantifying non-independence among food components. *Ecology* **85**, 1203-1216.
- Robertson, J. C. and Hazel, J. R.** (1995). Cholesterol content of trout plasma-membranes varies with acclimation temperature. *American Journal of Physiology-Regulatory Integrative and Comparative Physiology* **269**, R1113-R1119.
- Robertson, J. C. and Hazel, J. R.** (1997). Membrane constraints to physiological function at different temperatures: does cholesterol stabilize membranes at elevated temperatures? In: *Global Warming: Implications for Freshwater and Marine Fish (Society for Experimental Biology Seminar Series 61)* (eds. Woods, C. M. and McDonald, D. G.), pp. 25-49. Cambridge: Cambridge University Press.
- Schmoker, C. and Hernandez-Leon, S.** (2003). The effect of food on the respiration rates of *Daphnia magna* using a flow-through system. *Scientia Marina* **67**, 361-365.
- Secor, S. M.** (2009). Specific dynamic action: a review of the postprandial metabolic response. *Journal of Comparative Physiology B-Biochemical Systemic and Environmental Physiology* **179**, 1-56.
- Sommer, U., Gliwicz, Z. M., Lampert, W., and Duncan, A.** (1986). The PEG-model of seasonal succession of planktonic events in fresh waters. *Archiv fur Hydrobiologie* **106**, 433-471.
- Sperfeld, E., Martin-Creuzburg, D., and Wacker, A.** (2012). Multiple resource limitation theory applied to herbivorous consumers: Liebig's minimum rule vs. interactive co-limitation. *Ecology Letters* **15**, 142-150.
- Sperfeld, E. and Wacker, A.** (2009). Effects of temperature and dietary sterol availability on growth and cholesterol allocation of the aquatic keystone species *Daphnia*. *Journal of Experimental Biology* **212**, 3051-3059.
- Sperfeld, E. and Wacker, A.** (2011). Temperature- and cholesterol-induced changes in eicosapentaenoic acid limitation of *Daphnia magna* determined by a promising method to estimate growth saturation thresholds. *Limnology and Oceanography* **56**, 1273-1284.

- Sterner, R. W. and Elser, J. J.** (2002). Ecological stoichiometry. p. -584. Princeton, NJ.: Princeton University Press.
- Sterner, R. W. and Schulz, K. L.** (1998). Zooplankton nutrition: Recent progress and a reality check. *Aquat.Ecol.* **32**, 261-279.
- Svoboda, J. A. and Thompson, M. J.** (1985). Steroids. In: *Comprehensive insect physiology, biochemistry and pharamacology* (eds. Kerkut, G. A. and Gilbert, L. I.), pp. 137-175. Oxford: Pergamon.
- Thor, P., Cervetto, G., Besiktepe, S., Ribera-Maycas, E., Tang, K. W., and Dam, H. G.** (2002). Influence of two different green algal diets on specific dynamic action and incorporation of carbon into biochemical fractions in the copepod *Acartia tonsa*. *J.Plankton Res.* **24**, 293-300.
- Urabe, J. and Watanabe, Y.** (1990). Influence of food density on respiration rate of 2 crustacean plankters, *Daphnia galeata* and *Bosmina longirostris*. *Oecologia* **82**, 362-368.
- Urabe, J. and Watanabe, Y.** (1991). Effect of food concentration on the assimilation and production efficiencies of *Daphnia galeata* G.O. SARS (Crustacea:Cladocera). *Funct.Ecol.* **5**, 635-641.
- Van Donk, E., Lürling, M., Hessen, D. O., and Lokhorst, G. M.** (1997). Altered cell wall morphology in nutrient-deficient phytoplankton and its impact on grazers. *Limnol.Oceanogr.* **42**, 357-364.
- Volkman, J. K.** (2003). Sterols in microorganisms. *Applied Microbiology and Biotechnology* **60**, 495-506.
- von Elert, E., Martin-Creuzburg, D., and Le Coz, J. R.** (2003). Absence of sterols constrains carbon transfer between cyanobacteria and a freshwater herbivore (*Daphnia galeata*). *Proceedings of the Royal Society of London Series B-Biological Sciences* **270**, 1209-1214.
- Wacker, A. and Martin-Creuzburg, D.** (2007). Allocation of essential lipids in *Daphnia magna* during exposure to poor food quality. *Funct.Ecol.* **21**, 738-747.
- Wacker, A. and Martin-Creuzburg, D.** (2012). Biochemical nutrient requirements of the rotifer *Brachionus calyciflorus*: co-limitation by sterols and amino acids. *Funct.Ecol.* **26**, 1135-1143.
- Wagner, N. D., Hillebrand, H., Wacker, A., and Frost, P. C.** (2013). Nutritional indicators and their uses in ecology. *Ecology Letters* **16**, 535-544.

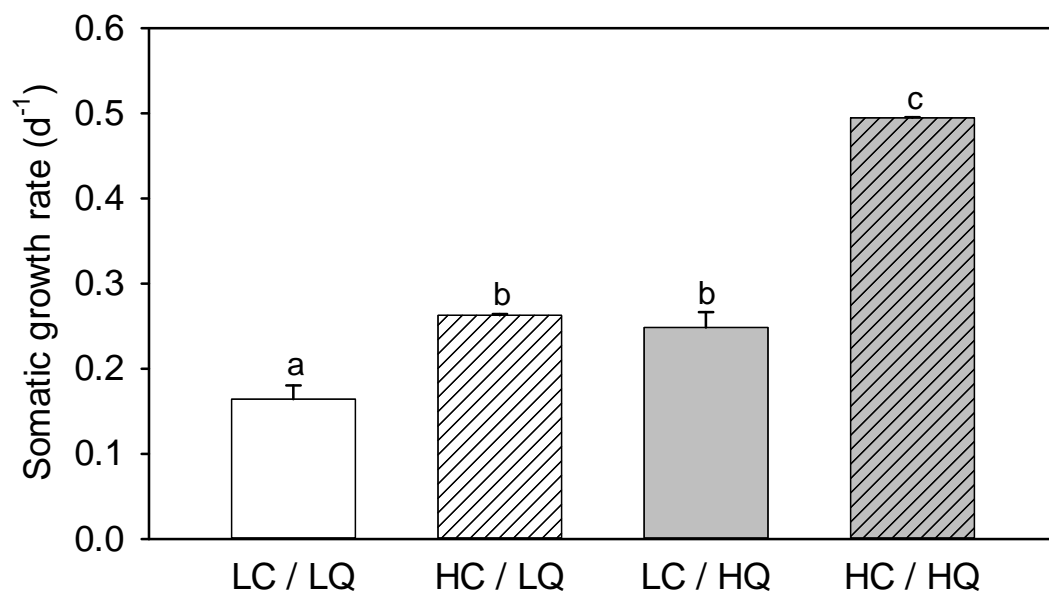

**Fig. 1**



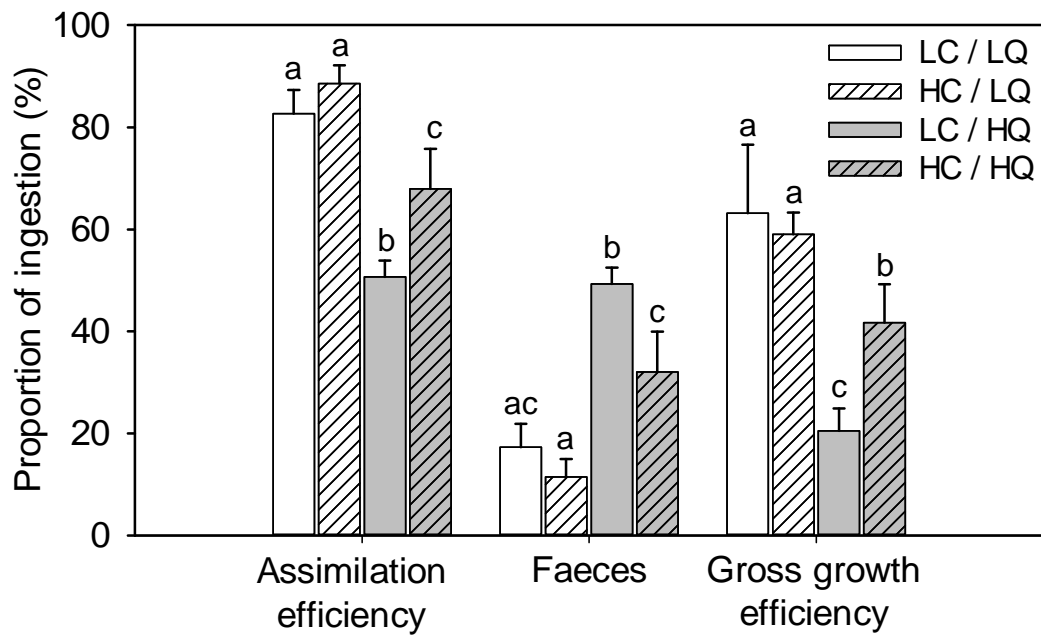

**Fig. 2**

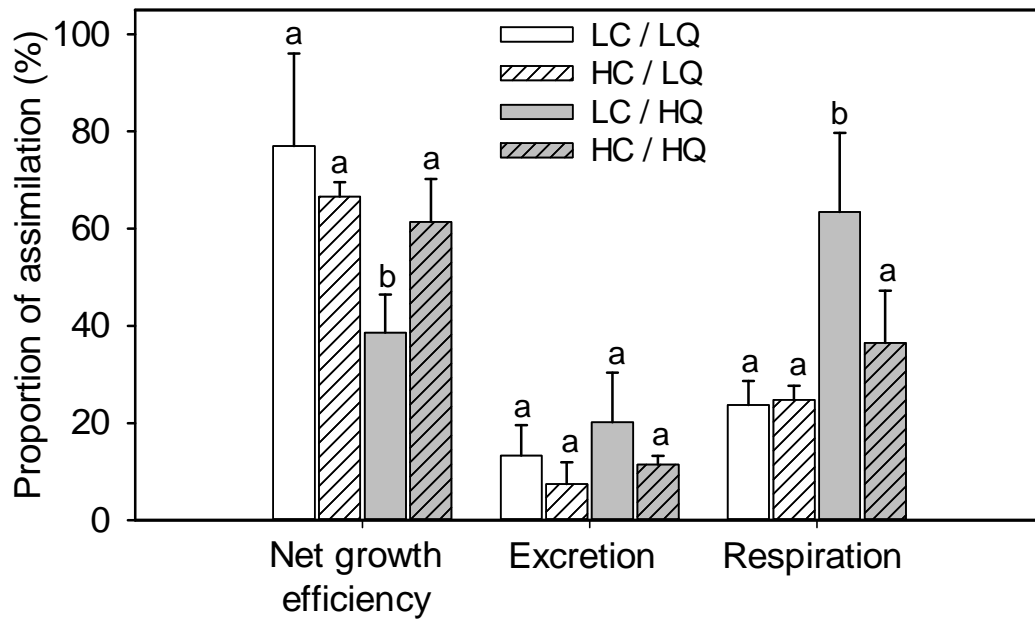

**Fig. 3**

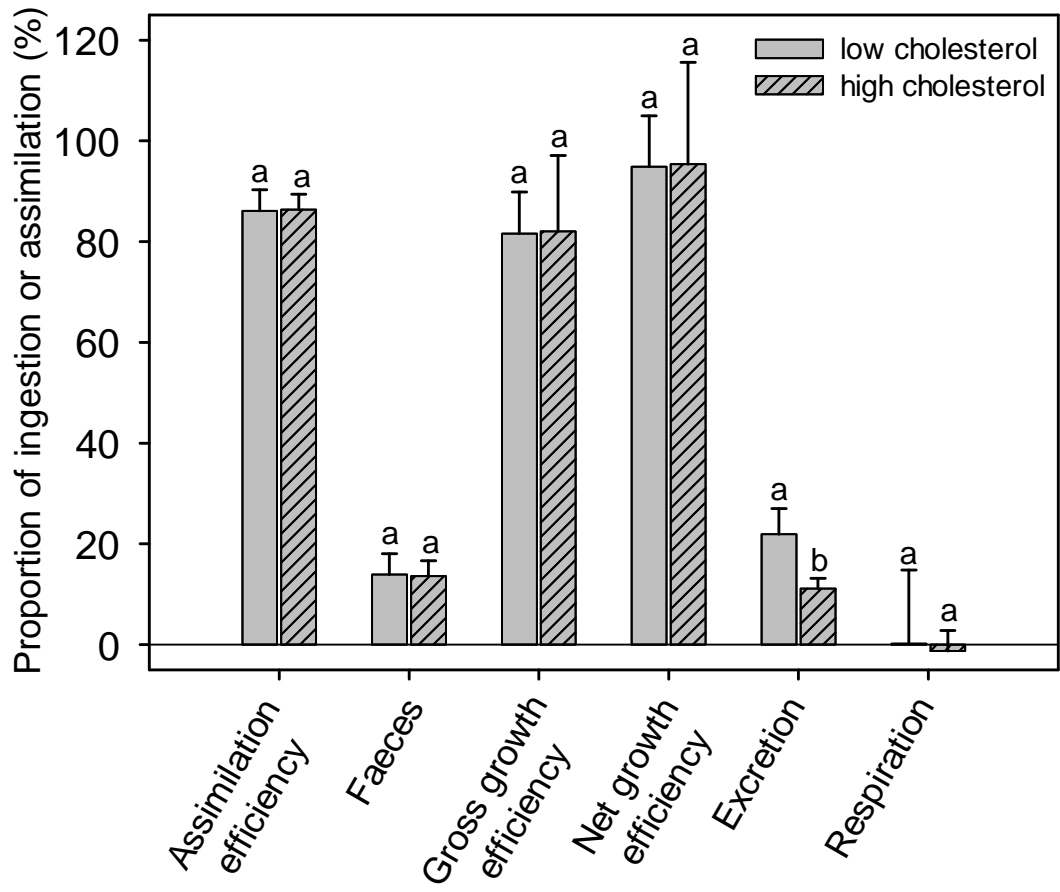

Fig. 4

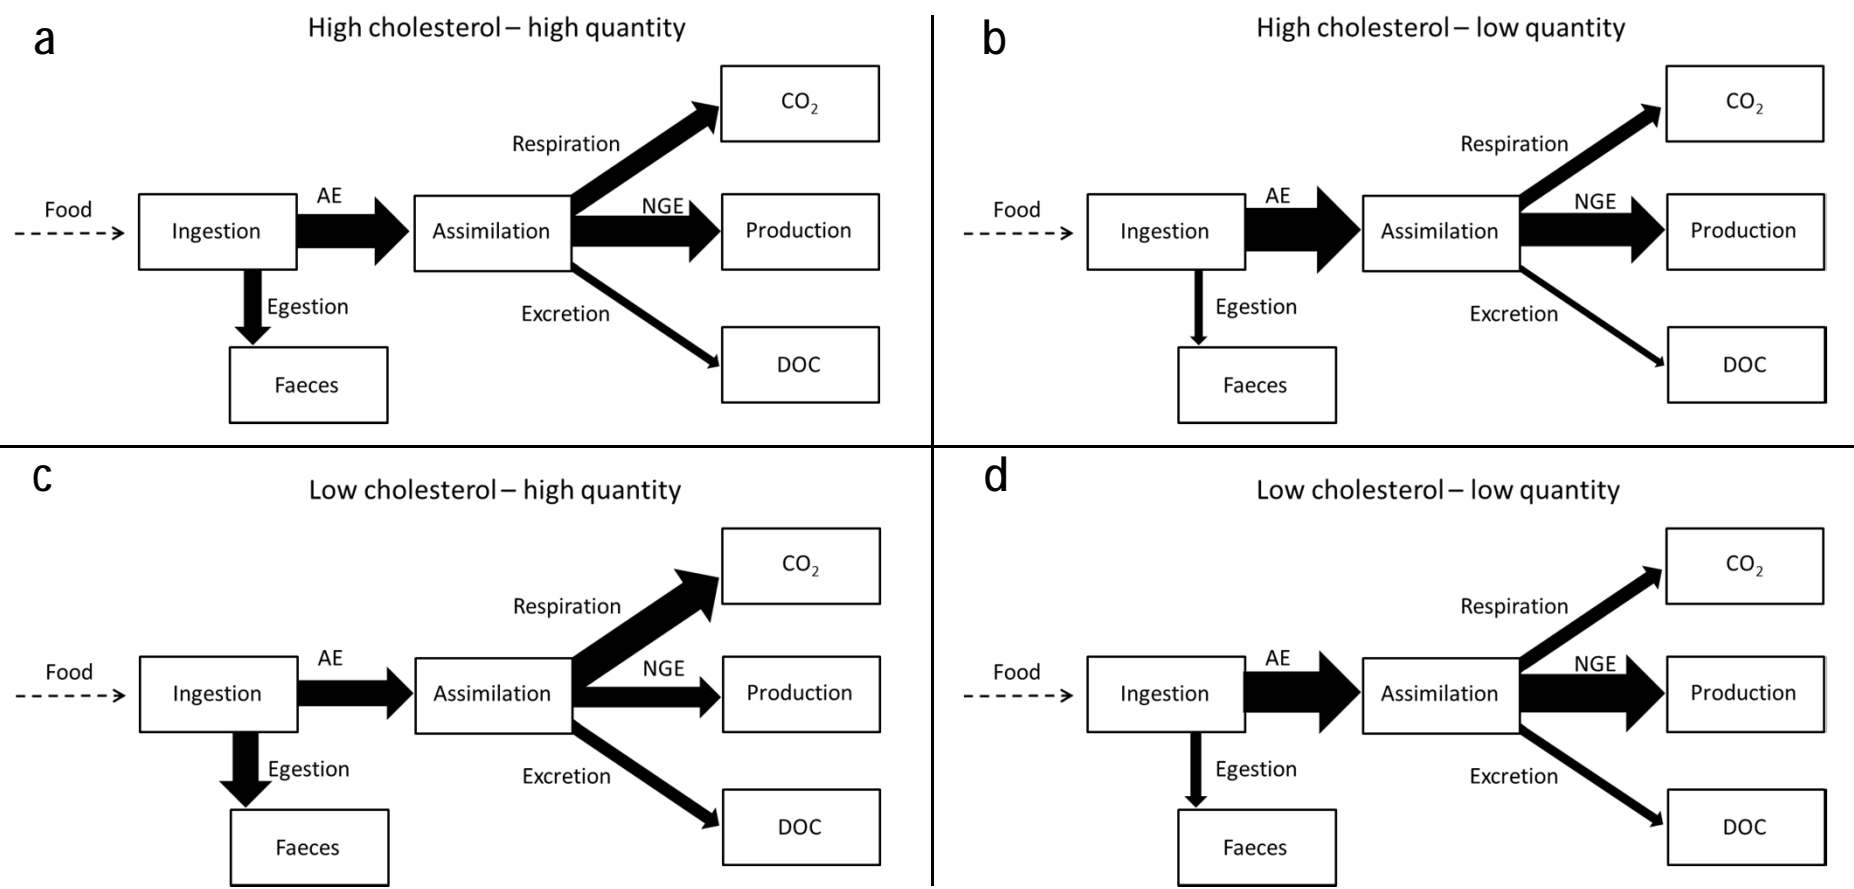

**Fig. 5**
